# Supplementary material
Source: publisher figshare collection journal article supplement (https://adisjournals.figshare.com/articles/dataset/_/23147474)
Supplement: Supplementary file 1 [file 2]

## **Medikamentöse Erstlinienbehandlung des metastasierten Nierenzellkarzinoms: Ein Podcast über die richtige Wahl und sichere Behandlung**

Philipp Ivanyi<sup>1,3,4#</sup>, Jonas Paul Wiegmann<sup>1,4</sup>, Hendrik Eggers<sup>1</sup>, Viktor Grünwald<sup>2,3</sup>

- (1) Abteilung für Hämatologie, Hämostaseologie, Onkologie, und Stammzelltransplantation. Claudia von Schilling-Center, Comprehensive Cancer Center, Medizinische Hochschule Hannover, Hannover
- (2) Abteilung für Urologie, Abteilung für internistische Onkologie, Leiter der interdisziplinären Uro-Onkologie, Westdeutsches Tumorzentrum, Universitätsklinikum Essen
- (3) Interdisziplinäre Arbeitsgruppe Nierenzellkarzinom der Deutschen Krebsgesellschaft (IAG-N-DKG)
- (4) Interdisziplinäre Immunonkologische Arbeitsgruppe, Claudia von Schilling-Center, Comprehensive Cancer Center Hannover (ICOG-CCC-H), Hannover

### **Korrespondenzautor:**

PD Dr. med. Philipp Ivanyi. Medizinische Hochschule Hannover, OE 6860, Carl-Neuberg Str. 1, 30625 Hannover. E-Mail: [Ivanyi.philipp@mh-hannover.de](mailto:Ivanyi.philipp@mh-hannover.de)

**ZUSAMMENFASSUNG:**

In den letzten 15 Jahren wurden enorme Anstrengungen in der medikamentösen Behandlung des metastasierten Nierenzellkarzinoms (mRCC) unternommen. Checkpoint-Inhibitoren (CPI) und Tyrosinkinase-Inhibitoren (TKI) dominieren das therapeutische Waffenarsenal, entweder als Kombination von CPI oder CPI/TKI, während die Bedeutung der TKI-Monotherapie abnimmt. Mit steigender Wirksamkeit nimmt jedoch auch die Toxizität zu. Der richtige Umgang mit Nebenwirkungen ist daher entscheidend. Das Erkennen von Nebenwirkungen, die Beurteilung ihrer Ätiologie und ein angemessenes Management sowie manchmal auch die Ausweitung der Diagnostik von Nebenwirkungen sind unabdingbar und erfordern Erfahrung und Wachsamkeit. Letztlich erzielt ein adäquates Sicherheitsmanagement optimale onkologische Ergebnisse und erhält die Lebensqualität der Patienten.

**Schlüsselwörter:**

TKI-PD-1, IO-IO, mRCC, medikamentöse Behandlung, unterstützende Maßnahmen, Nebenwirkungen

**DIGITALE FEATURES**

Dieser Artikel wird mit digitalen Features veröffentlicht, darunter ein Podcast-Audio und eine deutsche Übersetzung, um das Verständnis des Artikels zu erleichtern. Die digitalen Features zu diesem Artikel finden Sie unter <https://doi.org/10.6084/m9.figshare.23147474>

**TRANSCRIPT:**

**Podcast-Teilnehmer:**

Lydia Alborn: Chefredakteurin von *Advances in Therapy*

Philipp Ivanyi: Medizinische Hochschule Hannover

Viktor Grünwald: Universitätsklinikum Essen

Lydia: Willkommen zu unserer Adis-Podcast-Folge, die durch eine Fortbildungsförderung von Eisai finanziell unterstützt wurde. Ich freue mich, dass heute erneut die Experten Dr. Philipp Ivanyi und Dr. Viktor Grünwald bei uns sind, um über die Erstlinientherapie bei metastasiertem Nierenzellkarzinom zu sprechen. Sie werden von ihren Erfahrungen berichten, wie man Patienten sicher behandelt und die für sie am besten geeignete Therapie auswählt. Vielen Dank noch einmal, dass Sie sich die Zeit genommen haben. Könnten Sie sich für alle neuen Hörer unserer Podcasts, die Sie noch nicht kennen, kurz vorstellen?

Philipp: Ja, danke. Mein Name ist Philipp Ivanyi. Ich arbeite als internistischer Onkologe hier im Comprehensive Cancer Center in Hannover im Norden Deutschlands. Und einer unserer Schwerpunkte ist natürlich Urogenitalkrebs, insbesondere Nierenkrebs.

Viktor: Ja, und ich bin Viktor Grünwald. Ich bin ausgebildeter internistischer Onkologe, und ich bin ebenfalls auf die Therapie von Urogenitaltraktkrebs spezialisiert, insbesondere auf internistische Therapien, und ich freue mich, über Nierenkrebs zu sprechen. Ich finde, das ist ein großartiges Thema.

Philipp: Stimmt, das ist ein tolles Thema, und dann lass uns auch direkt in dieses interessante Thema eintauchen. Ich möchte auf den anderen Podcast verweisen, den wir gemacht haben, in dem wir über verschiedene Optionen gesprochen haben [1]. Jetzt wollen wir ein anderes Thema in den Fokus nehmen, Viktor. Wenn wir über starke Therapien sprechen, dann geht der Gesamtüberlebensvorteil meistens mit Toxizität einher und ein entsprechendes Management ist unerlässlich. Das ist eine allgemeine Empfehlung. Wenn ein Kollege neue klinische Erfahrungen macht, wie kann man dann über das Management nachdenken, worauf muss man besonders achten? Hast du ein Schema? Auf welche Maßnahmen muss man sich konzentrieren?

Viktor: Ja, man muss irgendeine Art von Management haben, denn mit dem Aufkommen der zielgerichteten Therapien setzen wir unsere Patienten, die eine Langzeittherapie erhalten, einer chronischen Toxizität aus, die sich meiner Ansicht nach von der unter Chemotherapie unterscheidet. Ich denke, das ist etwas, das wir in den letzten 15 Jahren gelernt haben. Und ich halte es für wichtig, die Patienten darüber aufzuklären. Was kann man erwarten und was ist wichtig? Was kann man vorbeugend tun? Und was sind die Stoppsignale? Wohin kann ich mich wenden, um Hilfe zu bekommen? Ich denke,

es sind im Grunde genommen ganz wenige Dinge, die ich für wichtig halte, wenn es um zielgerichtete Therapien geht.

Philipp: Richtig, insbesondere, wenn wir das ganze Thema der PD1 (Program Cell Death Protein-1)-TKI (Tyrosinkinase-Inhibitor)-Therapie diskutieren. Und wenn du mich fragst, gibt es da ein neues Phänomen. Die Nachsorge bereitet auch uns Sorgen. Insbesondere, wenn wir eine neue Checkpoint-Inhibition verwenden, müssen sich das Team und die Ärzte sowie der Patient besonders auf die Nachsorge konzentrieren, sobald eine Toxizität aufgetreten ist [2]. Und da fokussieren wir uns jetzt bereits auf eine der größten Herausforderungen, die wir in den letzten Jahren erfahren mussten, nämlich wie man mit der Toxizität von PD1-TKI-Kombinationstherapien umgeht, speziell weil es da gewisse Überschneidungen gibt. Ich denke, ein kluger Ansatz - und ich bin mir nicht sicher, wie du darüber denkst, Viktor - ist es, die Toxizität nach den einzelnen Substanzen aufzugliedern. Und würdest du zustimmen, wenn ich ein Konzept verfolge, bei dem ich sage, machen wir mit TKI-Daten weiter, die wir auch in der ASCO (American Society of Clinical Oncology) GU-Datenpräsentation hatten [3]? Wäre es angemessen, wenn ich sage, dass die TKI-Toxizität vor allem durch Durchfall gekennzeichnet ist, insbesondere bei VEGF (vascular endothelial growth factor), und bei hochwirksamen Inhibitoren durch Bluthochdruck, Lebertoxizität in Form eines AST-Anstiegs sowie Fatigue? Würdest du mir zustimmen und sagen, dass dies auch bei dir eine der häufigsten Nebenwirkungen dieser Therapie ist, wenn du eine Kombinationstherapie einsetzt [2]?

Viktor: Ja, in der Tat. Ich denke, es gibt verschiedene Arten von Toxizitäten. Einige von ihnen werden bei den Patienten erst spät erkannt, wie beispielsweise Bluthochdruck, wenn er sehr hoch ist. Wenn man nicht misst, weiß man es nicht. Und dann gibt es einige, die den Patienten wirklich zu schaffen machen, wie zum Beispiel Durchfall oder Fatigue. Und ich denke, dass dies vor allem durch mukokutane Toxizitäten bedingt ist. Das heißt überall an den Schleimhäuten und der Haut, und das macht den Patienten wirklich zu schaffen. Zum Beispiel können ein Hand-Fuß-Syndrom und Durchfall auftreten [4,5].

Philipp: Genau. Ja.

Viktor: Aber auch Stomatitis, und ich denke, das sind Dinge, die die Lebensqualität der Patienten wirklich beeinträchtigen.

Philipp Ivanyi: Richtig, und wir haben Daten von einigen TKI zum Auftreten von TKI-Toxizität im Zeitverlauf. Man sieht sehr oft ein frühes Auftreten dieser Art von Toxizitäten und häufig sind sie bei den einzelnen Patienten ziemlich konstant. Und ich denke, es gibt auch ein zeitliches Muster, das sich leicht von PD1 oder der Toxizität durch Checkpoint-Inhibition unterscheidet. Siehst du das auch so? Oder bist du der Ansicht, dass wir die vorhandenen Daten nicht überbewerten sollten?

Viktor: Ich denke, dass TKI eine chronische Toxizität verursachen, weil man die Tablette im Grunde täglich nehmen muss. Bei Manchen gibt es vielleicht zwischendurch ein paar Unterbrechungen, aber letzten Endes ist es eine chronische Exposition. Und wenn man sich die Daten ansieht, sieht man, dass die Meldungen mit der Zeit abnehmen. So gibt es im Laufe der Zeit immer weniger Durchfälle vom Schweregrad 3 und 4 oder Grad 2 und ich denke, das hängt mit dem Therapiemanagement zusammen. Das schließt auch Dosisanpassungen und andere Maßnahmen mit ein, die wir ergreifen, um die Patienten in der Therapie zu halten, und offen gesagt, ich denke, dass die Exposition bei den besten Patienten (also diejenigen, bei denen die Behandlung am stärksten wirkt und die die besten Ergebnisse erzielen) sogar noch länger ist als bei den anderen. Man muss also wirklich einen Weg finden, um mit der chronischen Toxizität von Tyrosinkinase-Inhibitoren umzugehen [4,5].

Philipp: Auch die Checkpoint-Inhibitoren werden meist über einen langen Zeitraum verabreicht (wenn das von onkologischer Seite sehr gut funktioniert). Glaubst du, dass sie gemäß den Daten zur Kinetik, die wir zum Melanom und insbesondere PD1 haben, um die 12. Behandlungswoche einsetzt? Sind das relevante Daten, die du im klinischen Alltag siehst [6,7]?

Viktor: Nun, ich denke, bei jeder Therapie gegen Nierenkrebs sind die ersten drei Monate entscheidend, um die Patienten auf die Behandlung einzustellen und zu sehen, welche Toxizität auftritt. Das heißt, wie äußert sie sich? Wie wirkt sie sich auf die Lebensqualität des Patienten aus? Müssen wir eine Dosisreduktion vornehmen? Ich halte das für sehr wichtig, und es trifft auch auf die Immuntherapien zu. Die Toxizität tritt mit Verzögerung auf und das ganze Spektrum der Toxizität zeigt sich nach einer zeitlichen Lücke von einigen Wochen. Aber allgemein gesagt, denke ich, dass die ersten drei oder vier Monate auch für Immuntherapien die relevanten Grenzen sind, was die Toxizität betrifft. Wir sprechen hier über frühe akute Toxizität, aber wie siehst du immunbedingte Toxizitäten, die zu einem späteren Zeitpunkt auftreten? Ich meine, ist das etwas, worüber man sich Sorgen machen müsste?

Philipp: Das ist wirklich eine gute Frage. Ich glaube, wenn man sich die Geschichte der Checkpoint-Inhibition anschaut, die unter anderem in Kardiomyozyten von Mäusen und in Mausmodellen ihren Anfang nahm, gibt es aus kardiologischer Sicht einige Bedenken hinsichtlich Kardiotoxizität. Aber wenn man sich die Daten anschaut - ich habe das Thema in letzter Zeit nicht verfolgt -, dann macht einem die Langzeittoxizität nicht wirklich Sorgen, oder? Was wir meiner Ansicht nach aus den Langzeitdaten in Bezug auf das Risiko während der Behandlung sehen können, ist, dass das Risiko von Nebenwirkungen fast immer das gleiche ist, wenn der Patient erst einmal die erste Phase überstanden hat. Aber ich glaube nicht - korrigiere mich, wenn ich mich irre -, dass es irgendwelche Daten zur Langzeittoxizität an sich gibt, oder? Zur kumulativen Toxizität.

Viktor: Ja. Was ich meine ist, dass, wenn man mit der Behandlung beginnt und ein Patient nach einjähriger Behandlung keine Nebenwirkungen hat, verhindert das nicht, dass Nebenwirkungen Grad 4 (gemäß CTCAE) auftreten.

Philipp: Genau. Ja. Das ist sehr wichtig.

Viktor: Das Risiko ist gering, es liegt sicher unter 10 %, aber es besteht. Man ist 18 Monate unter Behandlung und dann bekommt man durch die Behandlung Durchfall Grad 3. Das ist etwas, das es zu bedenken gilt und das anders ist als bei den Tabletten.

Philipp: Absolut. Ja. Das ist ein sehr wichtiger Punkt, auch wenn es sehr gut läuft, und kürzlich ist es auch einem meiner Patienten passiert, nachdem ungefähr eineinhalb Jahren nicht passiert war, hatte er ganz plötzlich ein wirklich ein schweres unerwünschtes Ereignis, und da muss man Geduld haben, nicht wahr? Damit haben wir jetzt also die Toxizität der einzelnen Schemata ein bisschen zusammengefasst. Ich denke, entscheidend ist, dass man sich darüber im Klaren ist (bei der Anwendung der einzelnen Therapieschemata, und es hilft einem eventuell ein bisschen, im klinischen Alltag zu unterscheiden) und dass man möglichst viel darüber weiß, von welchem Wirkstoff welche Toxizität herrührt, wenn man Kombinationen verwendet. Würdest du mir da zustimmen?

Viktor: Ja, grundsätzlich gibt es einige, die sehr charakteristisch und sehr spezifisch für eine bestimmte Therapie sind, und dann gibt es die Gruppe, bei der es Überschneidungen gibt. Ich denke da an Juckreiz und Hypertonie, die unter einer Immuntherapie oder TKI auftreten können, und dann ist Fatigue ein Problem. Durchfall ist ein Problem. Was ist mit Hepatitis, wenn man TKI/IO (immunonkologische) Therapien verwendet? Beide Komponenten können zu der Art von Toxizität beitragen, die wir sehen.

Philipp: Genau. Würdest du mir also zustimmen, dass ich, wenn ich eine PD1/TKI-Kombination einsetze, bei der ich echte Bedenken habe, oder bei der zumindest eine Toxizität Grad 2 gemäß CTC (Common Toxicity Criteria) auftritt, als erstes beide Substanzen pausiere? Würdest du diesem allgemeinen Ansatz als Faustregel zustimmen? Oder würdest du einen anderen Ansatz verfolgen?

Viktor: Das hängt von der Toxizität ab, die auftritt.

Philipp: OK. Ja.

Viktor: Wir hatten erst kürzlich einen Patienten, der im Rahmen einer Studie eine Toxizität Grad 4, das heißt eine Hepatitis Grad 4, hatte. Also mussten wir die Therapie mit beiden Wirkstoffen absetzen. Bei einem solchen Ausmaß ziehe ich auch die Gabe von Steroiden zum Zeitpunkt des Auftretens in Betracht; wenn es sich um einen Schweregrad 2 handelt, meine ich, dass einem das etwas Zeit zum Herumprobieren verschafft. Das heißt, nur die Leberenzyme sind erhöht, Bilirubin jedoch nicht. Ich denke, es ist angemessen zu sagen, dass man nicht notwendigerweise beide Mittel absetzen muss. Außerdem haben die Immunwirkstoffe eine sehr lange Halbwertszeit. Das heißt, selbst wenn man die Infusion nicht durchführt, sind immer noch genügend Antikörper im System, um die Immunantwort aufrechtzuerhalten. Ich bin weniger davon überzeugt, dass man jedes Mal unbedingt beide Wirkstoffe aussetzen muss, aber es hilft zu verstehen, was die treibende Kraft hinter der Toxizität ist.

Philipp: Ja genau, es hilft meistens, die Situation zu verstehen. Lass uns zum letzten Punkt kommen. Es gibt zahlreiche Reviews zum Management von IO-Kombinationen. Deren Fokus liegt natürlich nur auf den IO und nicht auf den TKI. Glaubst du, dass wir sie in Deutschland immer auch als Ampelsysteme bezeichnen? Denn sie zeigen grün, rot und gelb an und geben Hinweise darauf, was man tun sollte, entweder die Therapie fortsetzen oder weitere Diagnostik oder Steroide einleiten. Und denkst du, wir können einfach den Leitlinien für Checkpoint-Inhibition auch für die PD1/TKI-Kombinationen folgen?

Viktor: Mit einigen Abstrichen würde ich das so sagen. Denn, weißt du, ich denke, dass die Toxizität, die durch die Immunkomponente bedingt ist, wahrscheinlich gefährlicher ist. Sie hat stärkere Auswirkungen, und wenn man den richtigen Zeitpunkt für die Behandlung verpasst (das heißt für den Einsatz von Kortikosteroiden), wird es schwieriger und könnte für die Patienten tödlich sein. Daher halte ich das für den kritischen Punkt in Bezug auf die Immunkomponente. Deshalb legen wir auch so großen Wert darauf und empfehlen die Behandlung all dieser Nebenwirkungen, nicht wahr?

Philipp: Ja, so ist es. Aber ich meine, man muss fair bleiben. Du sagtest, es könnte tödlich sein. Wir müssen ehrlich sein, auch TKI sind keine einfachen Substanzen. Es liegen Metaanalysen vor, die hervorheben, dass sie selbst ebenfalls die Mortalität und Morbidität erhöhen, richtig [8]? Sie sind also auch nicht die einfachen zielgerichteten Wirkstoffe wie beispielsweise Imatinib bei CML (chronische myeloische Leukämie). Es sind auch potente und toxische Arzneimittel, die auch Schaden verursachen können. Zum Beispiel Kardiotoxizität. Aber lass uns auf eine letzte Frage von meiner Seite zurückkommen. Wenn ich mir all die Reviews und Expertenmeinungen ansehe und den Protokoll-Leitlinien folge – und wir haben in den meisten Fällen keine angemessen randomisierten prospektiven Studien zum Toxizitätsmanagement – dann sollte man nach meiner persönlichen Erfahrung immer, wenn die Situation unklar ist, insbesondere bei IO, nicht zu viel Zeit mit der Diagnostik vergeuden, sondern mit der Behandlung beginnen. Insbesondere mit Steroiden. –Das heißt, zu allererst einmal – würdest du dem zustimmen? – im Zweifel

fängt man mit Steroiden an? Und zweitens habe ich auch gelernt, dass es manchmal nur die progrediente Krebserkrankung, die Grunderkrankung, ist, die ungewöhnliche Situationen verursacht. Und wenn wir den Leitlinien folgen, verlieren wir diesen Punkt häufig aus den Augen.

Viktor: Ja, da hast du absolut recht. Es ist nicht immer eine Toxizität. Es kann auch die Krankheit selbst sein, und man ist mit der Behandlung einfach nicht erfolgreich. Ich meine, das ist eine Sache, an die man denken sollte. Die zweite Sache ist, wie du schon sagtest, dass man im Zweifel Steroide verwenden sollte, denn häufig kann eine Immuntherapie Nebenwirkungen verursachen, die nicht von den Nebenwirkungs- oder Unterstützungsleitlinien erfasst werden, und man versteht möglicherweise nicht, worum es geht und verpasst das Zeitfenster für die Behandlung des Patienten. Ich denke, ein sehr gutes Beispiel ist einer meiner Patienten; er hatte einen Immunwirkstoff, und es war nicht einmal eine Einzel-Wirkstoff-Immuntherapie, und er wurde wegen eines Schlaganfalls ins Krankenhaus aufgenommen, den er gar nicht hatte. Aber er wurde entsprechend behandelt, und an einem Tag war die rechte Seite betroffen, und dann, zwei Tage später, besserte sich die rechte Seite und auf der linken Seite setzte eine Hemiplegie ein. Daher begannen wir mit der Gabe von Kortikosteroiden, und am Ende des Tages hatte sich sein Zustand gebessert. Man kann allerdings viel Zeit mit der Diagnostik verbringen, und einige Untersuchungen müssen erfolgen. Man muss sicher sein, dass es sich nicht um eine andere Krankheit handelt, die man schlicht nicht festgestellt hat, aber man sollte nicht warten, denn bei einigen der Patienten mit seltenen Nebenwirkungen sind die Ergebnisse nur deshalb schlecht, weil sie nicht entsprechend mit Kortikosteroiden behandelt werden, und es liegen auch Daten vor ... ich meine, ich gerate hier ins Reden, nicht wahr? Aber es gibt Daten für, sagen wir mal, anfangs war Hepatitis Gegenstand von Biopsien, Leberbiopsien, was okay ist, denn ich meine, man muss verstehen, was die treibende Kraft dahinter ist. Aber es existiert eine Arbeit, der zufolge man durch diagnostische Verfahren und durch Biopsien die entsprechende Behandlung nur verzögert und dadurch schlechtere Ergebnisse erzielt. Ich meine, man weiß dann nach, ich weiß nicht, vielleicht ein paar Wochen, was die Ursache ist, aber man verpasst das Wichtige, nämlich die Behandlung.

Philipp: Genau. Aber dann ist es zu spät, nicht wahr?

Viktor: Weißt du, ich denke, das ist die Gefahr, wenn man es mit ungewöhnlichen Nebenwirkungen durch die Immuntherapie zu tun hat.

Philipp: Richtig, also können wir diesen Punkt ungefähr zusammenfassen als „If in doubt, steroid it out“, richtig? Wenn es sinnvoll ist, das so zu sagen. Und jetzt vielen Dank noch einmal für dieses nette Gespräch. Ich denke, wir können zusammenfassen, was wir beide über die Entwicklung der Therapie gelernt haben: Jede wirksame Therapie hat leider auch heute noch das Potenzial für schädliche Wirkungen. Sie kann toxisch sein, aber wir müssen etwas über die Toxizität erfahren und wir müssen lernen, sie zu erkennen,



und wir müssen versuchen, die Merkmale der einzelnen Toxizitäten im Kopf zu behalten und zu analysieren, und wir müssen wissen, wie wir sie entsprechend behandeln. Und manchmal, besonders, wenn wir IO verwenden, sollten wir nicht zu viel Zeit mit der Diagnostik verlieren [9]. Steroide sind nicht so schädlich, zumindest nicht bei kurzzeitiger Anwendung, und im Zweifel kann man sie auch absetzen. Vielen Dank noch einmal, dass du hierwarst und wir diese großartige Diskussion führen konnten, Viktor.

Viktor: Ich danke dir, Philipp, das war ein großartiges Thema.

Lydia: Danke Ihnen beiden, das war fantastisch.

#### **DANKSAGUNG:**

**Finanzielle Unterstützung:** Die Entwicklung dieses Podcasts wurde durch eine Fortbildungsförderung von Eisai finanziell unterstützt. Die Autoren wurden von der Zeitschrift ausgewählt, und der Inhalt des Podcasts wurde von den Autoren und der Chefredakteurin der Zeitschrift unabhängig entwickelt. Der Rapid Service und die Open-Access-Gebühren der Zeitschrift wurden ebenfalls durch die Fortbildungsförderung von Eisai finanziert.

**Autorenbeiträge:** Philipp Ivanyi, Viktor Grünwald, Jonas Paul Wiegmann und Hendrik Eggers haben die Datenrecherche zum Thema durchgeführt, Philipp Ivanyi hat den Podcast-Entwurf verfasst, Philipp Ivanyi und Viktor Grünwald haben den Podcast aufgenommen.

**Offenlegung von Interessenkonflikten:** Jonas Paul Wiegmann und Hendrik Eggers erklären, dass keine Interessenkonflikte bestehen.

Viktor Grünwald: Finanzielle Interessen, Vortrageeinladungen, persönlich: AstraZeneca, Astellas, BMS, Eisai, Ipsen, Janssen-Cilag, Merck, MSD, Pfizer, ONO Pharmaceutical, Novartis/AAA; Beiratsmitglied, persönlich: Apogepha, BMS; Eisai, EUSA Pharm, Cureteq, Debiopharm, Gilead, Janssen-Cilag, Merck, MSD, Pfizer, Novartis, Oncorena, PCI Biotech. Aktien/Beteiligungen, persönlich: AstraZeneca, BMS, MSD, SeaGen. Mitglied der Steuerungsgruppen: BMS, Eisai, Ipsen, Novartis, PharmaMar. Forschungszuschüsse, finanzielle Interessen, institutionell: AstraZeneca, BMS, MSD, Ipsen, Pfizer. Reisekostenzuschüsse: AstraZeneca, Ipsen, Merck, Janssen, Pfizer. Nicht-finanzielle Interessen: Mitgliedschaft: ASCO, ESMO, Deutsche Gesellschaft für Hämatologie und Medizinische Onkologie. Beratertätigkeit: Deutsche Krebsgesellschaft. Leitungsfunktion: Arbeitsgemeinschaft Internistische Onkologie (AIO).

Philipp Ivanyi: Finanzielle Interessen, Vortragseinladungen, persönlich: AstraZeneca, BMS, Eisai, Ipsen, Merck, MSD, Pfizer, Onkowissen, High-5-Oncology; Beiratsmitglied, persönlich: Apogepha, BMS; Eisai, EUSA Pharm, Diciphera, Merck, MSD, Pfizer. Aktien/Beteiligungen, persönlich: AstraZeneca, BMS, MSD. Forschungszuschüsse, finanzielle Interessen, institutionell: BMS, MSD, Merck Ipsen, Pfizer. Reisekostenzuschüsse: AstraZeneca, Ipsen, Merck, Janssen, Pfizer. Nicht-finanzielle Interessen: Mitgliedschaft: ASCO, ESMO, Deutsche Gesellschaft für Hämatologie und Medizinische Onkologie. Beratertätigkeit: Deutsche Krebsgesellschaft. Leitungsfunktion: Arbeitsgemeinschaft Internistische Onkologie (AIO).

**Einhaltung ethischer Richtlinien:** Dieser Artikel basiert auf bereits durchgeführten Studien und enthält keine neuen Studien mit menschlichen Teilnehmern oder Tieren, die von einem der Autoren durchgeführt wurden.

**Datenverfügbarkeit:** Data Sharing gilt nicht für diesen Artikel, da im Rahmen der aktuellen Studie keine Datensätze erstellt oder analysiert wurden.

#### LITERATUR:

1. Ivanyi, p. Podcast Discussing the Current Treatment Landscape for Renal Cell Carcinoma. Adv Ther DOI TO BE CONFIRMED
2. Eigentler TK, Hassel JC, Berking C, Aberle J, Bachmann O, Grünwald V, et al. Diagnosis, monitoring and management of immune-related adverse drug reactions of anti-PD-1 antibody therapy. Cancer Treat Rev. Elsevier; 2016;45:7–18.
3. Plimack ER. ASCO GU 2020: Toxicity Profiles and Side Effect Management of First-Line Treatment Options in Renal Cell Carcinoma. ASCO GU 2020 [Internet]. [cited 2023 Feb 12]; Available from: <https://meetings.asco.org/abstracts-presentations/180971/slides>
4. Schmidinger M. Understanding and managing toxicities of vascular endothelial growth factor (VEGF) inhibitors. Eur J Cancer Suppl. 2013;11:172–91.
5. Khan G, Moss RA, Braiteh F, Saltzman M. Proactive strategies for regorafenib in metastatic colorectal cancer: implications for optimal patient management. Cancer Manag Res. 2014;6:93–103.
6. Weber JS, Antonia SJ, Topalian SL, Schadendorf D, Larkin JMG, Sznol M, et al. Safety profile of nivolumab (NIVO) in patients (pts) with advanced melanoma (MEL): A pooled analysis. J Clin Oncol. Wolters Kluwer; 2015;33:9018–9018.
7. Weber JS, Hodi FS, Wolchok JD, Topalian SL, Schadendorf D, Larkin J, et al. Safety Profile of Nivolumab Monotherapy: A Pooled Analysis of Patients With Advanced Melanoma. J Clin Oncol. Wolters Kluwer; 2017;35:785–92.
8. Schutz FAB, Je Y, Richards CJ, Choueiri TK. Meta-Analysis of Randomized Controlled Trials for the Incidence and Risk of Treatment-Related Mortality in Patients With Cancer Treated With Vascular Endothelial Growth Factor Tyrosine Kinase Inhibitors. J Clin Oncol. Wolters Kluwer; 2012;30:871–7.
9. Haanen J, Obeid M, Spain L, Carbonnel F, Wang Y, Robert C, et al. Management of toxicities from immunotherapy: ESMO Clinical Practice Guideline for diagnosis, treatment and follow-up☆. Ann Oncol. Elsevier; 2022;33:1217–38.
